# Supplementary material for: MicroRNA‐122 and cytokeratin‐18 have potential as a biomarkers of drug‐induced liver injury in European and African patients on treatment for mycobacterial infection
Source: PubMed Central journal article supplement (PMC8629110; doi:10.1111/bcp.14736), 2021-01-26

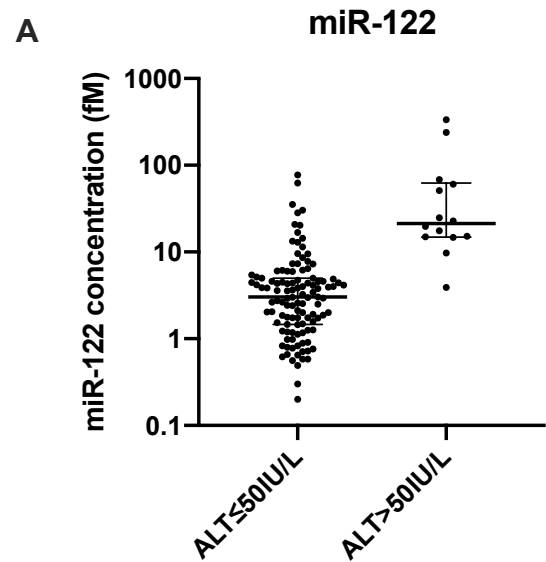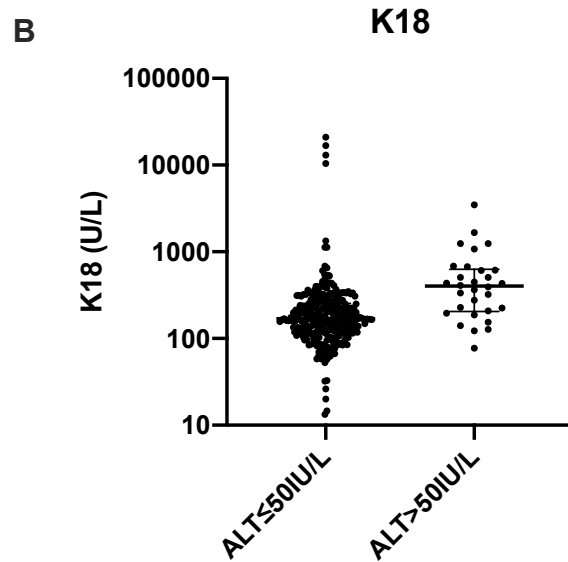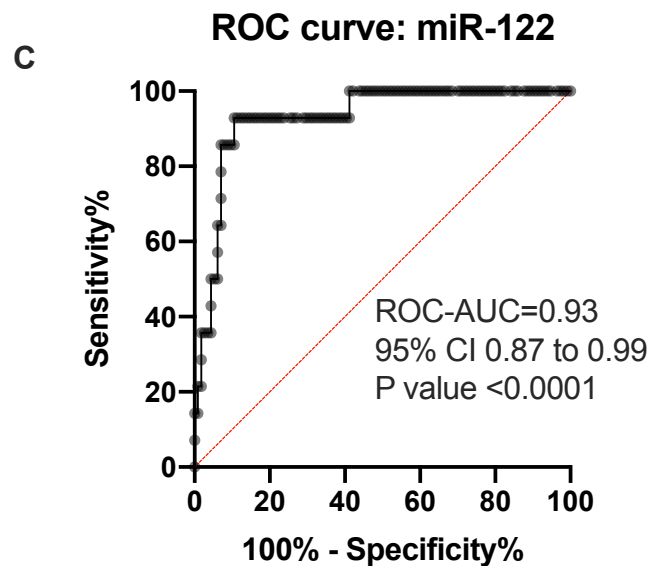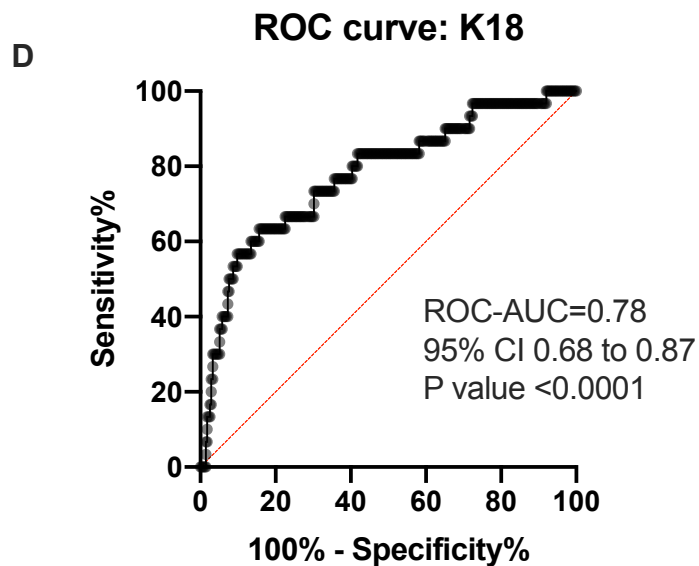

Supplement: BCP-87-3206-s001.pdf [file BCP-87-3206-s001.pdf]
